# Supplementary material for: The proposal of a modeling methodology for an industrial internet information model
Source: PeerJ Comput Sci. 2022 Nov 15;8:e1150. doi: 10.7717/peerj-cs.1150 (PMC9680887; doi:10.7717/peerj-cs.1150)
Supplement: Supplemental Information 4 [file peerj-cs-08-1150-s004.xlsx]

## Sheet: Sheet1
	Manufacturer	Factory batch	Serial number	Equipment type	Production date	Running status	Working status	Running time	Alarm status	Material in warehouse	Material out form warehouse
Manufacturer	1	1/2×1/2	1/2×1/2	1/2×1/2	1/2×1/2	1/3×1/3	1/3×1/3	1/3×1/4	1/3×1/5	1/3×1/4	1/3×1/4
Factory batch	1/2×1/2	1	1	1/2×1/2	1/2×1/2	1/3×1/3	1/3×1/3	1/3×1/4	1/3×1/5	1/3×1/4	1/3×1/4
Serial number	1/2×1/2	1	1	1/2×1/2	1/2×1/2	1/3×1/3	1/3×1/3	1/3×1/4	1/3×1/5	1/3×1/4	1/3×1/4
Equipment type	1/2×1/2	1/2×1/2	1/2×1/2	1	1/2×1/2	1/3×1/3	1/3×1/3	1/3×1/4	1/3×1/5	1/3×1/4	1/3×1/4
Production date	1/2×1/2	1/2×1/2	1/2×1/2	1/2×1/2	1	1/3×1/3	1/3×1/3	1/3×1/4	1/3×1/5	1/3×1/4	1/3×1/4
Running status	1/3×1/3	1/3×1/3	1/3×1/3	1/3×1/3	1/3×1/3	1	1	1/2	1/3	1/2	1/2
Working status	1/3×1/3	1/3×1/3	1/3×1/3	1/3×1/3	1/3×1/3	1	1	1/2	1/3	1/2	1/2
Running time	1/3×1/4	1/3×1/4	1/3×1/4	1/3×1/4	1/3×1/4	1/2	1/2	1	1/2	1/2×1/2	1/2×1/2
Alarm status	1/3×1/5	1/3×1/5	1/3×1/5	1/3×1/5	1/3×1/5	1/3	1/3	1/2	1	1/3×1/2	1/3×1/2
Material in warehouse	1/3×1/4	1/3×1/4	1/3×1/4	1/3×1/4	1/3×1/4	1/2	1/2	1/2×1/2	1/3×1/2	1	1/2×1/2
Material out form warehouse	1/3×1/4	1/3×1/4	1/3×1/4	1/3×1/4	1/3×1/4	1/2	1/2	1/2×1/2	1/3×1/2	1/2×1/2	1
