# Supplementary material for: The proposal of a modeling methodology for an industrial internet information model
Source: PeerJ Comput Sci. 2022 Nov 15;8:e1150. doi: 10.7717/peerj-cs.1150 (PMC9680887; doi:10.7717/peerj-cs.1150)
Supplement: Supplemental Information 5 [file peerj-cs-08-1150-s005.xlsx]

## Sheet: Sheet1
	CNC system	CNC controller	Sensor	Spindle drive	Spindle motor	PLC controller	Auxiliary system	Cooling system	Lubrication system	Electric servo system	Hydraulic system
CNC system	1	1/2	1/2	1/2	1/2	1/2	1/4	1/3×1/2	1/3×1/2	1/3×1/2	1/3×1/2
CNC controller	1/2	1	1/4	1/4	1/4	1/4	1/2×1/3	1/3×1/3	1/3×1/3	1/3×1/3	1/3×1/3
Sensor	1/2	1/4	1	1/4	1/4	1/4	1/2×1/3	1/3×1/3	1/3×1/3	1/3×1/3	1/3×1/3
Spindle drive	1/2	1/4	1/4	1	1	1/4	1/2×1/3	1/3×1/3	1/3×1/3	1/3×1/3	1/3×1/3
Spindle motor	1/2	1/4	1/4	1	1	1/4	1/2×1/3	1/3×1/3	1/3×1/3	1/3×1/3	1/3×1/3
PLC controller	1/2	1/4	1/4	1/4	1/4	1	1/2×1/3	1/3×1/3	1/3×1/3	1/3×1/3	1/3×1/3
Auxiliary system	1/4	1/2×1/3	1/2×1/3	1/2×1/3	1/2×1/3	1/2×1/3	1	1/2	1/2	1/2	1/2
Cooling system	1/3×1/2	1/3×1/3	1/3×1/3	1/3×1/3	1/3×1/3	1/3×1/3	1/2	1	1/4	1/4	1/4
Lubrication system	1/3×1/2	1/3×1/3	1/3×1/3	1/3×1/3	1/3×1/3	1/3×1/3	1/2	1/4	1	1/4	1/4
Electric servo system	1/3×1/2	1/3×1/3	1/3×1/3	1/3×1/3	1/3×1/3	1/3×1/3	1/2	1/4	1/4	1	1/4
Hydraulic system	1/3×1/2	1/3×1/3	1/3×1/3	1/3×1/3	1/3×1/3	1/3×1/3	1/2	1/4	1/4	1/4	1
